# Supplementary material for: In situ formation and spatial variability of particle number concentration in a European megacity
Source: Copernicus journal article supplement (doi:10.5194/acp-15-10219-2015), 2015-09-15
Supplement: Supplementary file 1 [file acp-15-10219-2015-supplement.pdf]

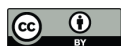

*Supplement of*

## **In situ formation and spatial variability of particle number concentration in a European megacity**

**M. Pikridas et al.**

*Correspondence to:* S. N. Pandis ([spyros@chemeng.upatras.gr](mailto:spyros@chemeng.upatras.gr))

The copyright of individual parts of the supplement might differ from the CC-BY 3.0 licence.

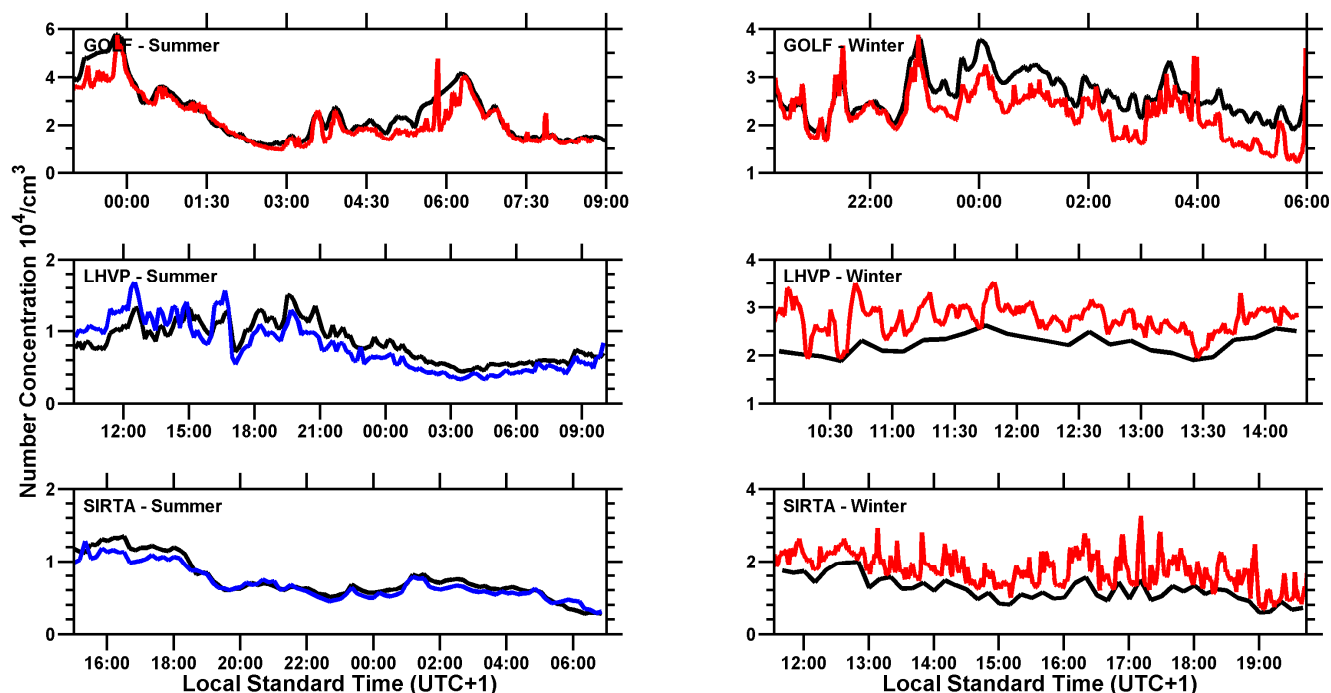

**Figure S1.** Time series of particle number concentration used for intercomparison between aerosol sizing instrumentation located at the stationary sites (black lines) and the mobile laboratory CPC (MoLa - red line; MOSQUITA - blue line). During summer the difference does not exceed 10% at all sites. The larger discrepancy at SIRTA during winter is attributed to the lower size detection limit of the CPC employed at MoLa (2.5 nm) compared to the 10 nm of the SMPS system at SIRTA.

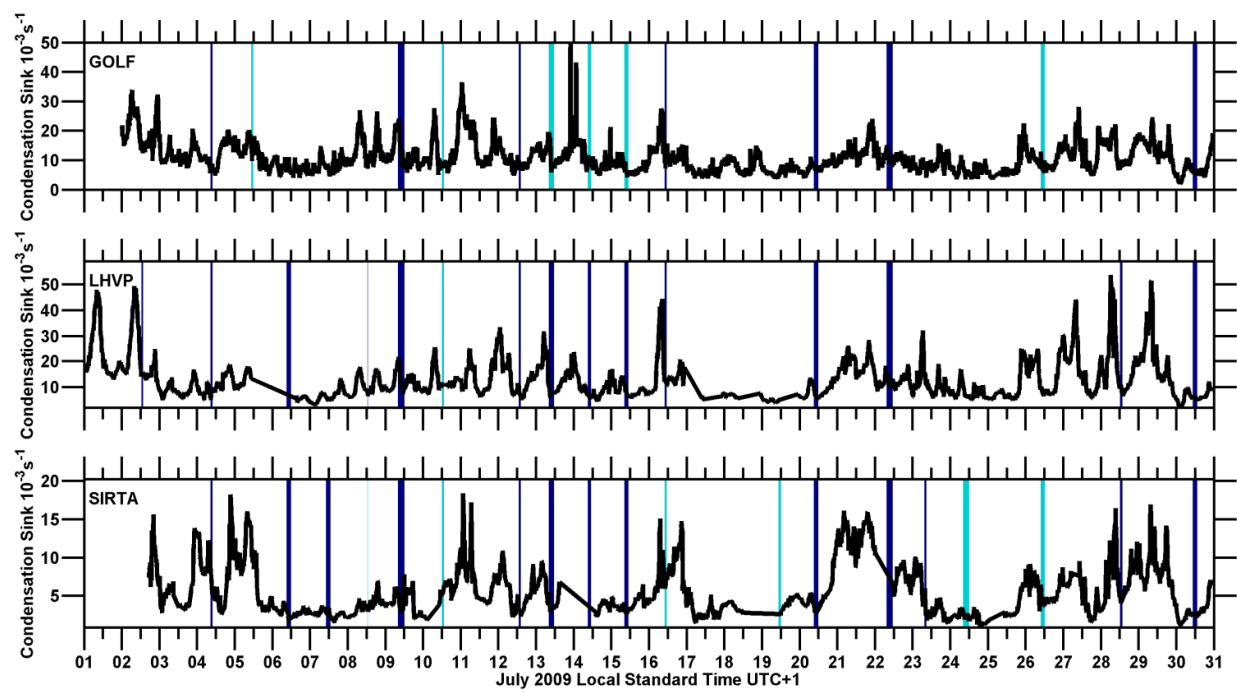

56 **Figure S2.** Condensation sink measured at the three ground sites during July 2009. Dark  
 57 and light blue bars indicate the event and undefined periods, respectively.

58  
 59  
 60  
 61  
 62  
 63  
 64  
 65  
 66  
 67  
 68  
 69  
 70  
 71  
 72  
 73  
 74  
 75  
 76  
 77  
 78  
 79  
 80  
 81  
 82  
 83  
 84  
 85

86

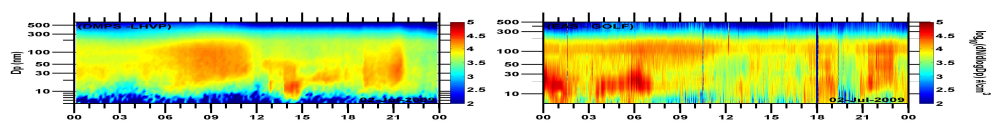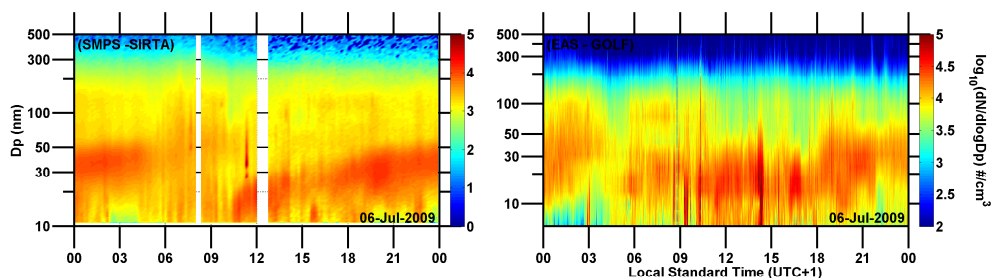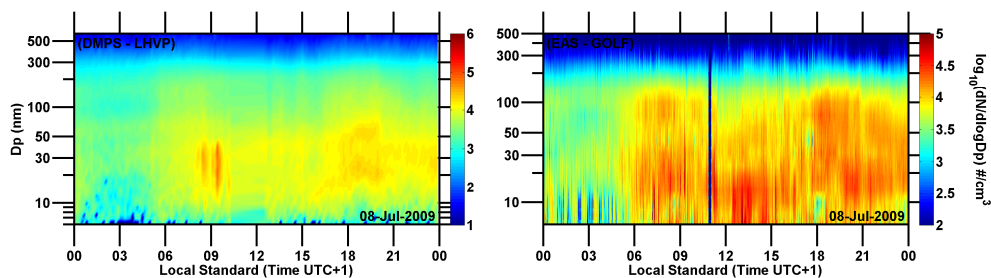

87

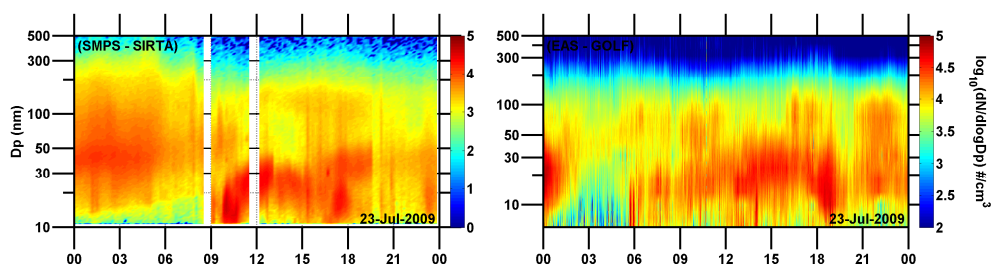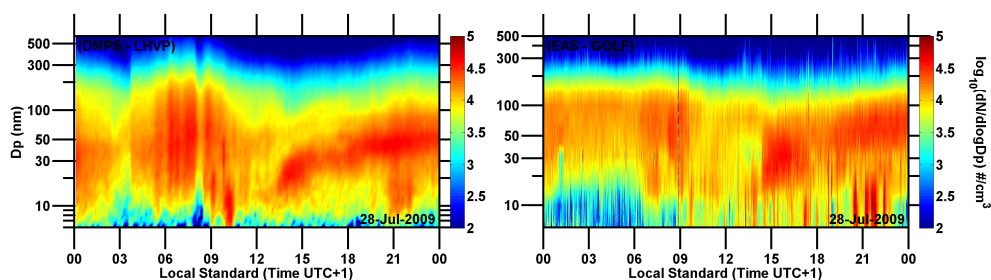

88

89

90

**Figure S3.** Number size distribution time series when a nucleation event was identified at SIRT and/or LHVP but not at GOLF.  $D_p$  is the particle diameter.

91

92

93

94

95

96

97

98

99

100

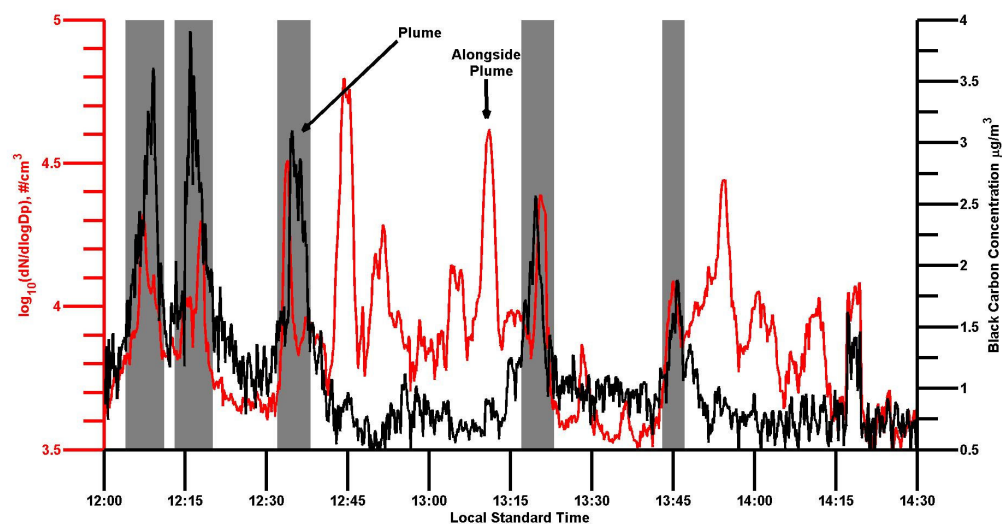

97

98 **Figure S4.** Number (red line) and black carbon (black line) concentrations during  
 99 airborne measurements on July 1<sup>st</sup> 2009. Number concentration increases observed  
 100 simultaneously with increases in black carbon mass concentration (grey areas) were  
 101 attributed to the Paris plume. Number concentration increases were also observed along  
 102 the plume.

103

104

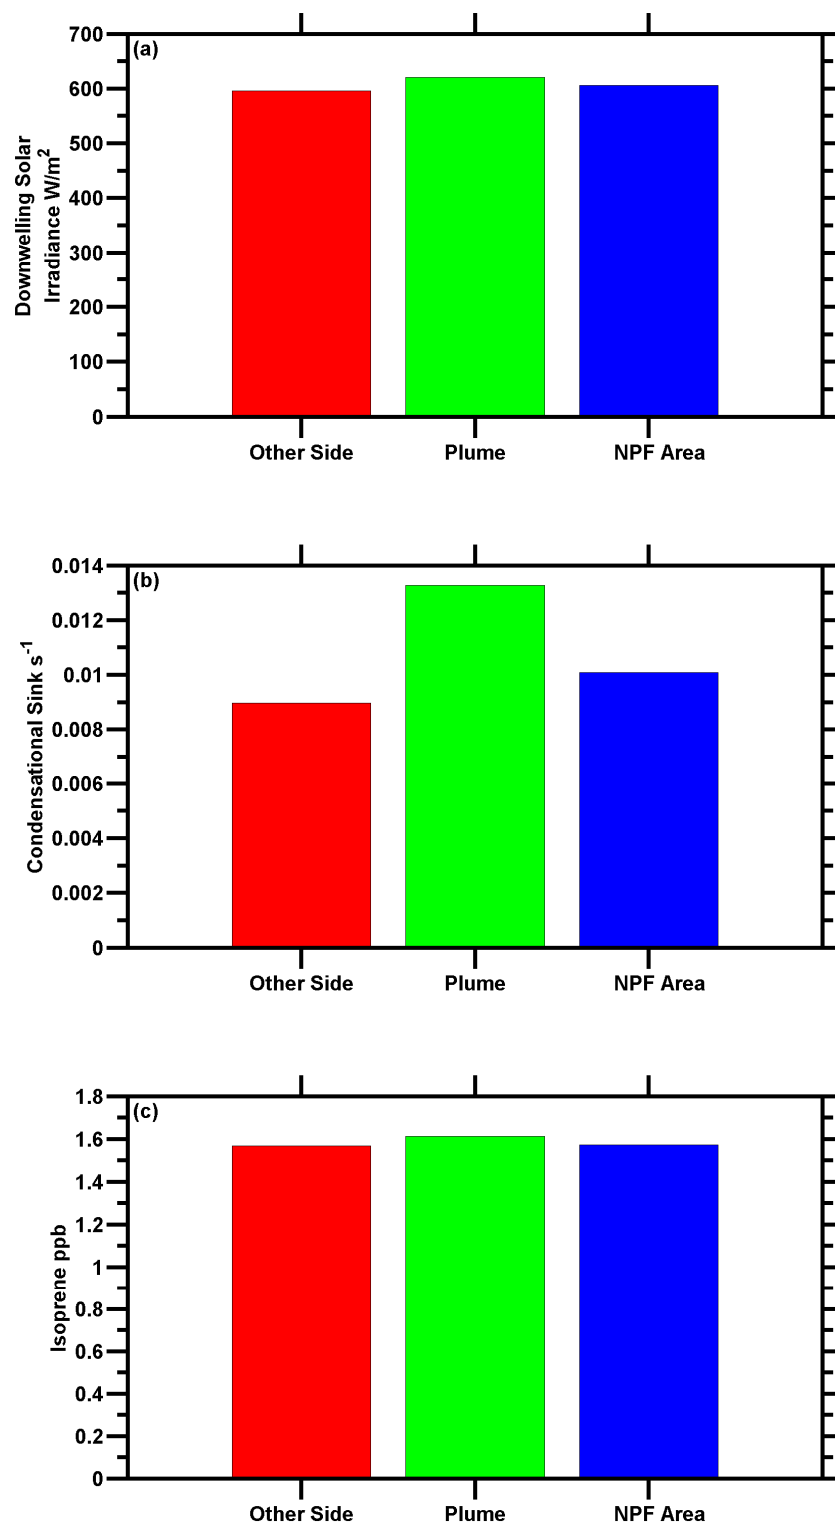

**Figure S5.** Downwelling solar irradiance (top), condensation sink (middle) and isoprene concentration (bottom) comparison of the Paris plume with areas on either side of the plume when high particle concentrations were observed at one side outside of the plume. Significant differences among these areas were not observed with respect to condensation sink, isoprene and solar irradiance.
